# Supplementary material for: Achieving broadband near-infrared emission with superior anti-thermal quenching by optimizing the excited-state population of Cr3+ in Gd3ScGa4O12 garnet phosphors
Source: Royal Society of Chemistry journal article supplement (doi:10.1039/d4mh01157k), 2024-01-01
Supplement: d4mh01157k1.pdf [file d4mh01157k1.pdf]

Achieving broadband near-infrared emission with superior anti-thermal quenching by optimizing excited-state population of Cr<sup>3+</sup> in Gd<sub>3</sub>ScGa<sub>4</sub>O<sub>12</sub> garnet phosphors

Wangyu Liu<sup>a</sup>, Lifang Yuan<sup>b</sup>, Haoyi Wu<sup>a</sup>, Huafeng Dong<sup>a</sup>, Yahong Jin<sup>\*ac</sup>

<sup>a</sup>School of Physics and Optoelectronic Engineering, Guangdong University of Technology, WaiHuan Xi Road, No. 100, Guangzhou 510006, China.

<sup>b</sup>School of Electronics and Communications, Guangdong Mechanical & Electrical Polytechnic, Guangzhou 510515, China

<sup>c</sup>Guangdong Provincial Key Laboratory of Sensing Physics and System Integration Applications, WaiHuan Xi Road, No. 100, Guangzhou 510006, China.

E-mail: yhj@gdut.edu.cn

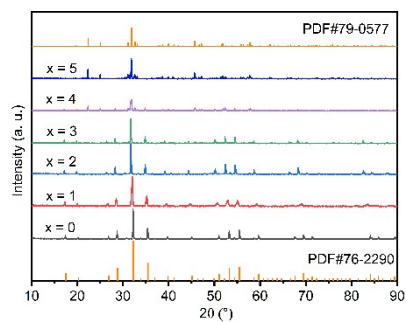

**Fig. S1.** XRD patterns of  $\text{Gd}_3\text{Sc}_x\text{Ga}_{5-x}\text{O}_{12}:0.08\text{Cr}^{3+}$  ( $x = 0-5$ ).

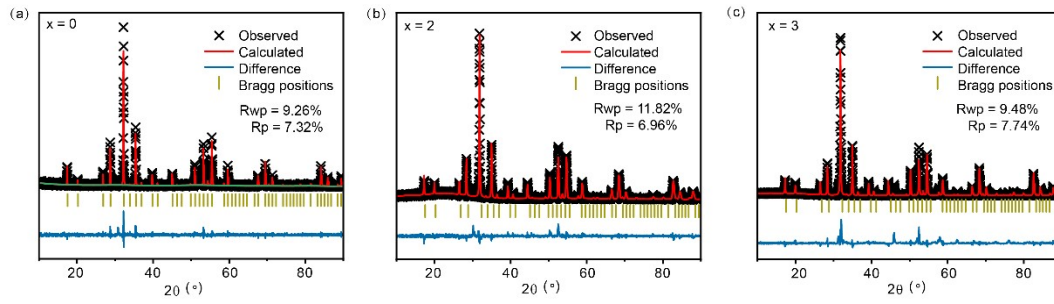

**Fig. S2.** (a–c) XRD Rietveld refinement of  $\text{Gd}_3\text{Sc}_x\text{Ga}_{5-x}\text{O}_{12}$  ( $x = 0, 2, 3$ ).

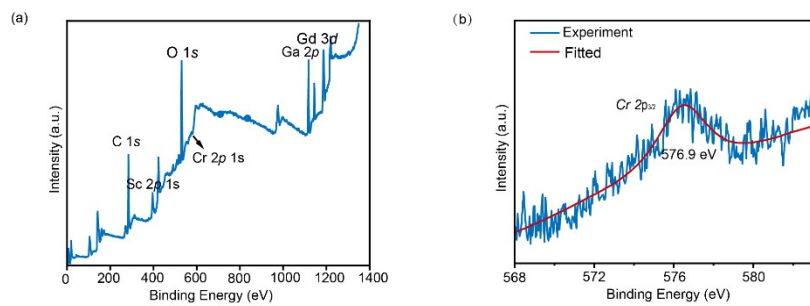

**Fig. S3.** (a) XPS full spectrum and (b) Cr 2p scan of  $\text{Gd}_3\text{ScGa}_4\text{O}_{12}:0.08\text{Cr}^{3+}$ .

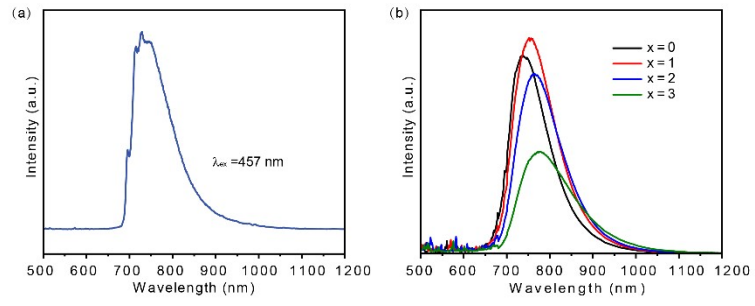

**Fig. S4.** (a) Emission spectrum of  $\text{Gd}_3\text{ScGa}_4\text{O}_{12}:0.08\text{Cr}^{3+}$  at 77 K. (b) Relative emission intensity of  $\text{Gd}_3\text{Sc}_x\text{Ga}_{5-x}\text{O}_{12}:0.08\text{Cr}^{3+}$  ( $x = 0-3$ ).

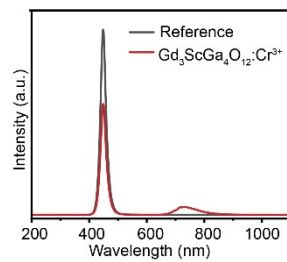

**Fig. S5.** IQE (82.75%), EQE (28.19%), and absorption coefficient (34.07%) of  $\text{Gd}_3\text{ScGa}_4\text{O}_{12}:0.08\text{Cr}^{3+}$ .

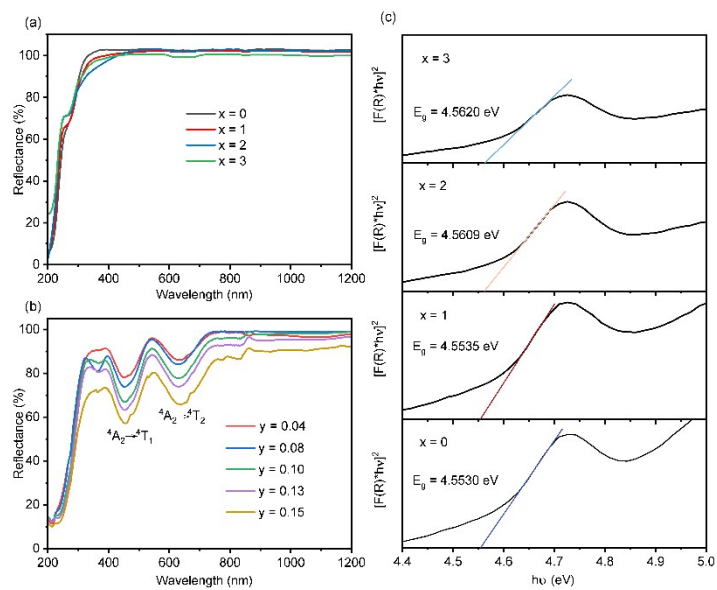

**Fig. S6.** (a) DRS of  $Gd_3Sc_xGa_{5-x}O_{12}$  ( $x = 0-3$ ). (b) DRS of  $Gd_3ScGa_4O_{12}:yCr^{3+}$  ( $y = 0.04-0.15$ ). (c) The estimated optical band gaps of  $Gd_3Sc_xGa_{5-x}O_{12}$  ( $x = 0-3$ ).

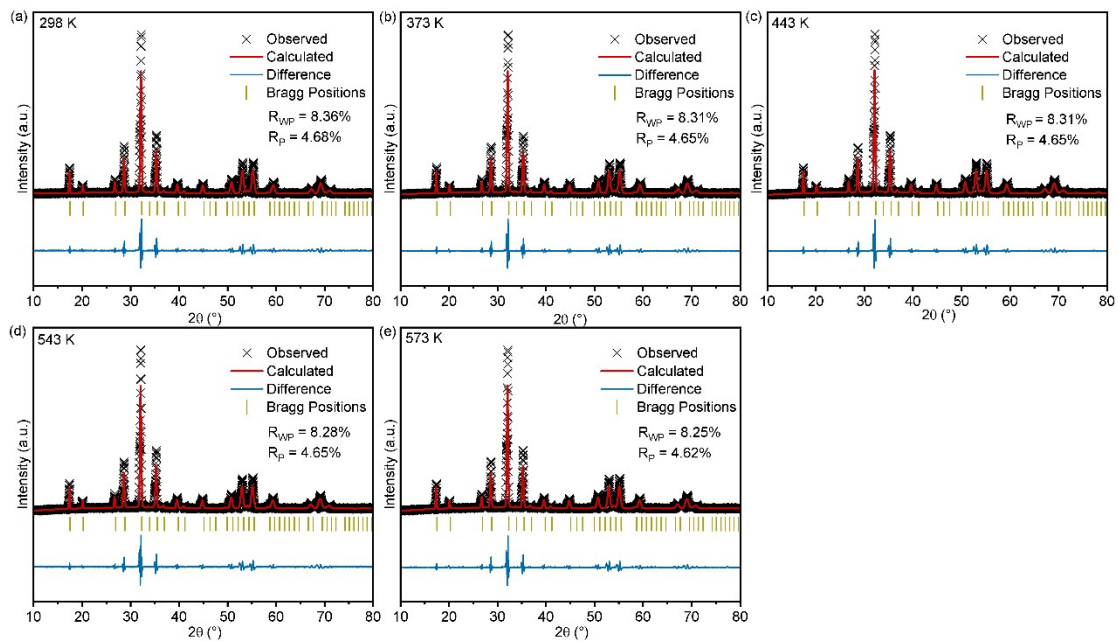

**Fig. S7.** XRD Rietveld refinement of (a)  $\text{Gd}_3\text{ScGa}_4\text{O}_{12}:0.08\text{Cr}^{3+}$  at (a) 25 °C, (b) 100 °C, (c) 170 °C, (d) 270 °C, (e) 300 °C.



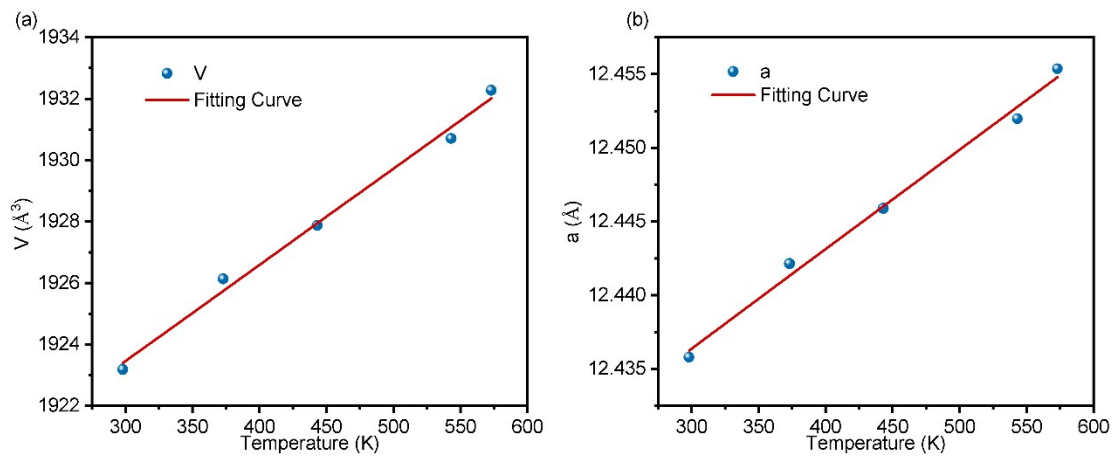

**Fig. S8.** Temperature-dependent (a) volume and (b) lattice parameters for  $\text{Gd}_3\text{ScGa}_4\text{O}_{12}:0.08\text{Cr}^{3+}$ .

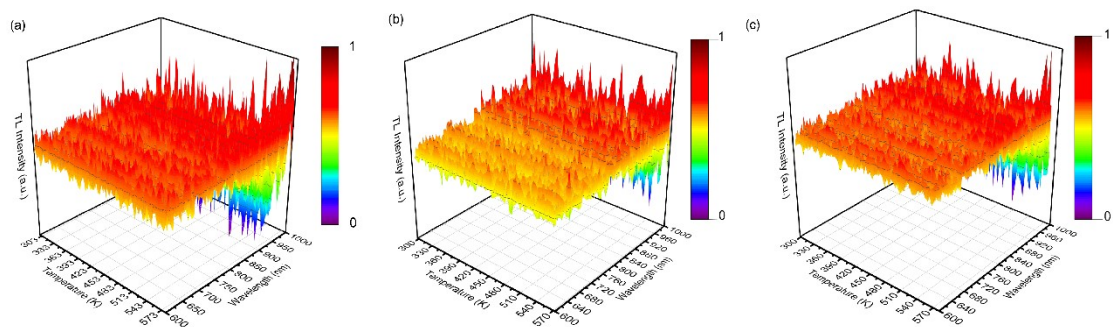

**Fig. S9.** Thermoluminescence curves of  $\text{Gd}_3\text{ScGa}_4\text{O}_{12}:0.08\text{Cr}^{3+}$  measured without preheating (a) and with preheating at (b) 100 °C and (c) 150 °C under 460 nm excitation.

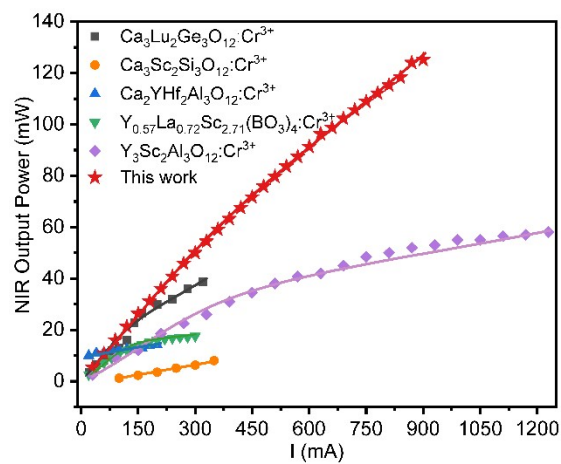

**Fig. S10.** A comparison of the NIR output power with other garnet NIR phosphors reported previously.<sup>[1-5]</sup>

**Table S1.** Crystallographic data of  $\text{Gd}_3\text{Sc}_x\text{Ga}_{5-x}\text{O}_{12}$  ( $x = 0-3$ ).

| Samples                  | x = 0               | x = 1                      | x = 2               | x = 3               |
|--------------------------|---------------------|----------------------------|---------------------|---------------------|
| Crystal system           |                     | Cubic                      |                     |                     |
| Space group              |                     | $\text{Ia}\bar{3}\text{d}$ |                     |                     |
| a=b=c (Å)                | 12.3691             | 12.4523                    | 12.5496             | 12.5747             |
| $\alpha=\beta=\gamma$    | 90                  | 90                         | 90                  | 90                  |
| Volume (Å <sup>3</sup> ) | 1892.389            | 1930.835                   | 1976.485            | 1988.344            |
| Sc-O <sub>6</sub> (Å)    | 1.999               | 2.012                      | 2.076               | 2.087               |
| R <sub>p</sub>           | 0.0732              | 0.0731                     | 0.0696              | 0.0774              |
| R <sub>wp</sub>          | 0.0926              | 0.0936                     | 0.1182              | 0.0948              |
| $\chi^2$                 | 1.35                | 1.299                      | 1.827               | 4.937               |
| Gd1                      | (0.125,0.000,0.250) | (0.125,0.000,0.250)        | (0.125,0.000,0.250) | (0.125,0.000,0.250) |
| Ga1                      | (0.000,0.000,0.000) | (0.000,0.000,0.000)        | (0.000,0.000,0.000) | (0.000,0.000,0.000) |
| Ga2                      | (0.375,0.000,0.250) | (0.375,0.000,0.250)        | (0.375,0.000,0.250) | (0.375,0.000,0.250) |
| O1                       | (0.967,0.053,0.149) | (0.968,0.052,0.150)        | (0.968,0.053,0.150) | (0.969,0.053,0.151) |
| Sc1                      | (0.000,0.000,0.000) | (0.000,0.000,0.000)        | (0.000,0.000,0.000) | (0.000,0.000,0.000) |

**Table S2.** The survey of ion-doped (excluding Cr<sup>3+</sup>-doped) inorganic phosphors with anti-TQ performance.

| Host materials                                                                            | Activators                                             | Ex/Em (nm)   | FWHM (nm) | IQE   | I <sub>T</sub> /I <sub>RT</sub> | Ref. |
|-------------------------------------------------------------------------------------------|--------------------------------------------------------|--------------|-----------|-------|---------------------------------|------|
| Ba <sub>2</sub> ZnGe <sub>2</sub> O <sub>7</sub>                                          | Bi <sup>3+</sup>                                       | 346/500      | 129       | –     | 138%@423K                       | [6]  |
| Na <sub>3</sub> Ca <sub>4</sub> TeP <sub>3</sub> O <sub>15</sub>                          | Tb <sup>3+</sup> , Eu <sup>3+</sup>                    | 376/545, 617 |           | –     | 109%@423K                       | [7]  |
| Lu <sub>2</sub> SrAl <sub>4</sub> SiO <sub>12</sub>                                       | Eu <sup>2+</sup>                                       | 342/420      |           | –     | 106%@423K                       | [8]  |
| Sc <sub>1.8</sub> Zr <sub>0.1</sub> Nb <sub>0.1</sub> W <sub>2.85</sub> O <sub>11.7</sub> | Yb/Er <sup>3+</sup>                                    | 522/980      |           | –     | 114%@448K                       | [9]  |
| Ca <sub>3.6</sub> In <sub>3.6</sub> (PO <sub>4</sub> ) <sub>6</sub>                       | Dy <sup>3+</sup>                                       | 349/575      |           | 30.3% | 108.2%@423K                     | [10] |
| Ba <sub>3</sub> EuAl <sub>2</sub> O <sub>7.5</sub>                                        | Eu <sup>3+</sup>                                       | 270/593      |           |       | 140%@443K                       | [11] |
| Ca <sub>2</sub> InSbO <sub>6</sub>                                                        | Eu <sup>3+</sup>                                       | 395/616      |           | 82%   | 114.5%@380K                     | [12] |
| LaSc <sub>3</sub> (BO <sub>3</sub> ) <sub>4</sub>                                         | Eu <sup>3+</sup>                                       | 395/618      |           | 88.3% | 129.2%@548K                     | [13] |
| KAl <sub>11</sub> O <sub>17</sub>                                                         | Mn <sup>2+</sup>                                       | 450/510      | ~50       | –     | 160%@548K                       | [14] |
| Cs <sub>2</sub> MP <sub>2</sub> O <sub>7</sub> (M=Ba,Sr,Ca)                               | Eu <sup>2+</sup>                                       | 360/548      |           | 98.9% | 120%@448K                       | [15] |
| Mg <sub>3</sub> Y <sub>2</sub> Ge <sub>3</sub> O <sub>12</sub>                            | Eu <sup>3+</sup> , Mn <sup>4+</sup>                    | 420/660      |           | –     | 127%@500K                       | [16] |
| CsMoO <sub>2</sub> F <sub>3</sub>                                                         | Mn <sup>4+</sup>                                       | 450/633      |           | 54%   | 129.3%@423K                     | [17] |
| LaAlO <sub>3</sub>                                                                        | Ca <sup>2+</sup> , Bi <sup>3+</sup> , Mn <sup>4+</sup> | 340/734      |           | 89.3% | 103%@423K                       | [18] |
| In <sub>0.5</sub> Sc <sub>1.5</sub> (MoO <sub>4</sub> ) <sub>3</sub>                      | Eu <sup>3+</sup>                                       | 246/615      |           | 57.8% | 108.2%@473K                     | [19] |

**Table S3.** Crystallographic data of  $\text{Gd}_3\text{ScGa}_4\text{O}_{12}:0.08\text{Cr}^{3+}$  at different temperatures.

| Materials                                              | $\text{Gd}_3\text{ScGa}_4\text{O}_{12}:0.08\text{Cr}^{3+}$ |              |                            |              |              |
|--------------------------------------------------------|------------------------------------------------------------|--------------|----------------------------|--------------|--------------|
| Measuring temperature/ $^{\circ}\text{C}$              | 25                                                         | 100          | 170                        | 270          | 300          |
| Crystal system                                         |                                                            |              | Cubic                      |              |              |
| Space group                                            |                                                            |              | $\text{Ia}\bar{3}\text{d}$ |              |              |
| a=b=c ( $\text{\AA}$ )                                 | 12.4440                                                    | 12.4498      | 12.4563                    | 12.4652      | 12.4687      |
| $\alpha=\beta=\gamma$                                  | $90^{\circ}$                                               | $90^{\circ}$ | $90^{\circ}$               | $90^{\circ}$ | $90^{\circ}$ |
| Volume ( $\text{\AA}^3$ )                              | 1926.995                                                   | 1929.669     | 1932.691                   | 1936.864     | 1938.468     |
| Average bond length of Cr-O ( $\text{\AA}$ )           | 2.053                                                      | 2.055        | 2.057                      | 2.058        | 2.061        |
| Volume of $\text{CrO}_6$ octahedron ( $\text{\AA}^3$ ) | 11.4548                                                    | 11.4942      | 11.5276                    | 11.5486      | 11.6141      |
| $R_p$                                                  | 0.0469                                                     | 0.0466       | 0.0466                     | 0.0466       | 0.0464       |
| $R_{wp}$                                               | 0.0838                                                     | 0.0832       | 0.0833                     | 0.0829       | 0.0827       |
| $\chi^2$                                               | 2.08                                                       | 2.86         | 2.92                       | 2.79         | 2.67         |

## References:

- [1] J. Feng, X. Wu, D. Zhu, J. Chen, Z. Mu, *Journal of Luminescence* **2022**, 252, 119379.
- [2] Y. Zhou, X. Li, T. Seto, Y. Wang, *ACS Sustainable Chemistry & Engineering* **2021**, 9, 3145-3156.
- [3] D. Huang, Q. Ouyang, H. Xiao, B. Wang, H. Lian, Q. Zeng, J. Lin, *Dalton Transactions* **2021**, 51, 908-916.
- [4] D. Qian, Y. Jin, Y. Li, H. Wu, Y. Hu, *Applied Physics A* **2024**, 130, 233.
- [5] H. Wu, L. Jiang, K. Li, C. Li, H. Zhang, *Journal of Materials Chemistry C* **2021**, 9, 11761-11771.
- [6] Y. Wei, H. Yang, Z. Gao, X. Yun, G. Xing, C. Zhou, G. Li, *Laser & Photonics Reviews* **2021**, 15, 2000048.
- [7] R. Song, R. Wang, X. Yang, X. Bian, H. Fu, *Applied Materials Today* **2024**, 38, 102246.
- [8] T. Ying-Ying, Y. Zi-Han, W. Chun-Hao, W. Ting-Wei, L. Fa-Chun, *Journal of the American Ceramic Society* **2022**, 105, 5240.
- [9] B. Fu, H. Yan, R. Li, L. Feng, Y. Yu, G. Gong, H. Huang, J. Liao, *Laser & Photonics Reviews* 2400739, doi.org/10.1002/lpor.202400739.
- [10] R.-R. Wang, J. Zhang, Y.-J. Liu, G.-H. Li, G.-M. Cai, *Dalton Transactions* **2023**, 52, 5552.
- [11] X. Bian, R. Wang, S. Li, Q. Shi, H. Fu, *Journal of Luminescence* **2023**, 257, 119768.
- [12] X. Geng, Y. Xie, Y. Ma, Y. Liu, J. Luo, J. Wang, R. Yu, B. Deng, W. Zhou, *Journal of Alloys and Compounds* **2020**, 847, 156249.
- [13] S. Wang, Y. Xu, T. Chen, W. Jiang, J. Liu, X. Zhang, W. Jiang, L. Wang, *Chemical Engineering Journal* **2021**, 404, 125912.
- [14] Z. Zhou, H. Zhu, X. Huang, Y. She, Y. Zhong, J. Wang, M. Liu, W. Li, M. Xia, *Chemical Engineering Journal* **2022**, 433, 134079.
- [15] Y. Wei, Z. Gao, S. Liu, S. Chen, G. Xing, W. Wang, P. Dang, A. A. Al Kheraif, G. Li, J. Lin, *Advanced Optical Materials* **2020**, 8, 1901859.
- [16] Y. Wei, H. Yang, Z. Gao, Y. Liu, G. Xing, P. Dang, A. A. A. Kheraif, G. Li, J. Lin, R. S. Liu, *Advanced Science* **2020**, 7, 1903060.
- [17] S. He, F. Xu, T. Han, Z. Lu, W. Wang, J. Peng, F. Du, F. Yang, X. Ye, *Chemical Engineering Journal* **2020**, 392, 123657.
- [18] S. Fang, T. Lang, T. Han, J. Wang, J. Yang, S. Cao, L. Peng, B. Liu, A. N. Yakovlev, V. I. Korepanov, *Chemical Engineering Journal* **2020**, 389, 124297.
- [19] T. Tian, Z. Wang, C. Mao, M. Chen, Y. Chu, Y. Li, *Journal of Alloys and Compounds* **2024**, 973, 172887.
